# Supplementary material
Source: Springer Nature journal article supplement (https://www.springermedizin.de/resource/supplementary/12955_2009_613_MOESM7_ESM.pdf/9560836)

Patient Age

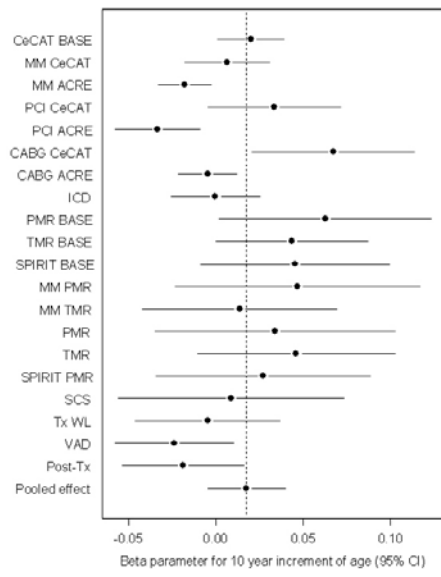

Sex

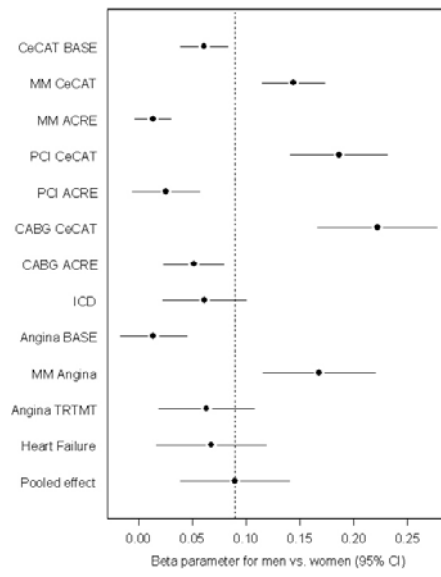

Treadmill exercise time

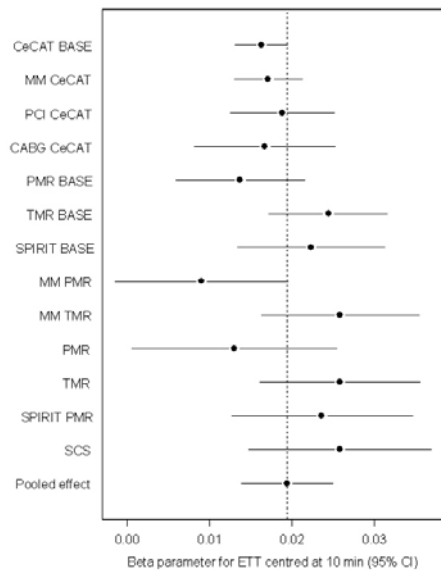

CCS class

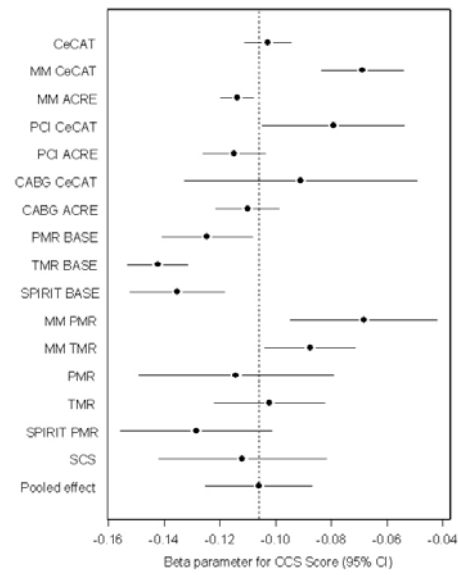

SF-6D

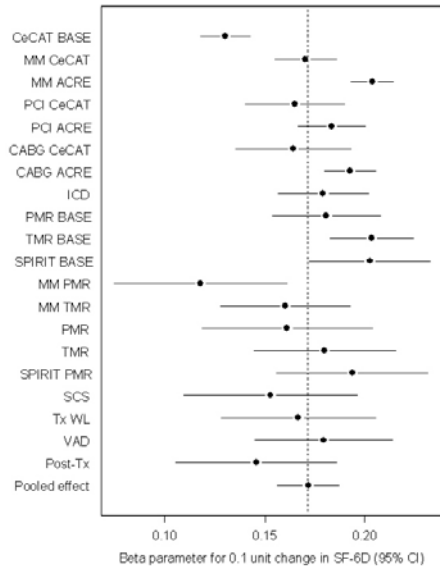

Seattle Angina Exertional Capacity Scale

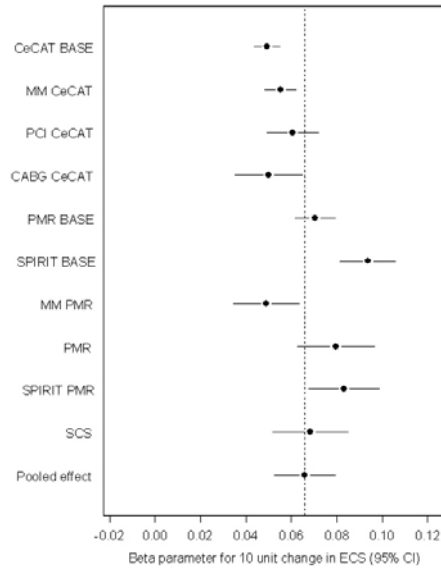

Seattle Angina Anginal Frequency Scale

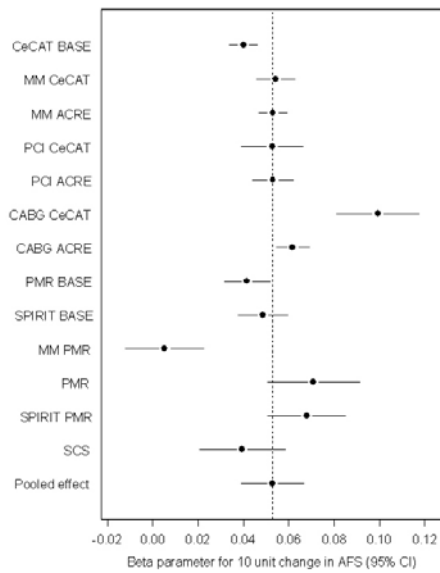

Seattle Angina Anginal Stability Scale

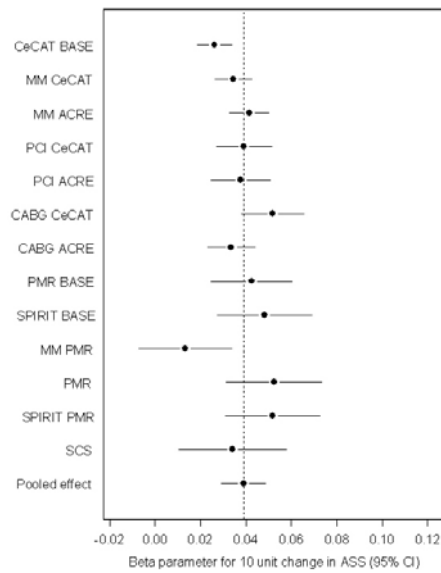

Seattle Angina Disease Perception Scale

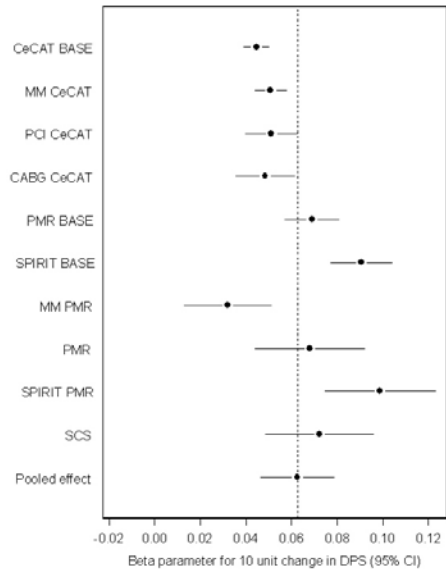

Seattle Angina Treatment Satisfaction Scale

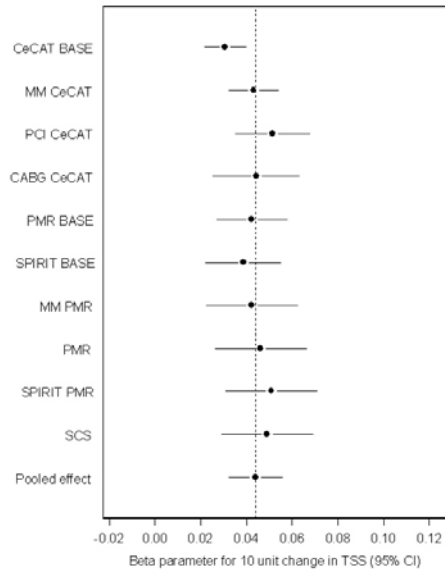

Supplement: MOESM7 [file 9560836]
